# Supplementary material
Source: PubMed Central journal article supplement (PMC7960457)
Supplement: 16-00022.pdf [file 16-00022.pdf]

**On-line Table 1: Differences in general characteristics between included and not included participants<sup>a</sup>**

|                                              | Included (n = 181) | Not Included (n = 14) |
|----------------------------------------------|--------------------|-----------------------|
| Age (yr)                                     | 77 (2)             | 76 (3)                |
| Female (No.) (%)                             | 96 (53)            | 8 (57)                |
| MMSE (median) (IQR)                          | 29 (28–30)         | 29 (29–30)            |
| BMI (median) (IQR)                           | 25.7 (24.0–27.9)   | 24.5 (22.4–28.2)      |
| History of stroke or TIA (No.) (%)           | 19 (11)            | 2 (15)                |
| History of CVD (No.) (%)                     | 41 (23)            | 3 (23)                |
| Diabetes mellitus (No.) (%)                  | 20 (11)            | 0 (0)                 |
| Smoking status                               |                    |                       |
| Never (No.) (%)                              | 82 (45)            | 8 (57)                |
| Former (No.) (%)                             | 88 (49)            | 5 (36)                |
| Current (No.) (%)                            | 11 (6)             | 1 (7)                 |
| Antihypertensive drug use (No.) (%)          | 108 (60)           | 7 (50)                |
| RR systolic (median) (IQR)                   | 148 (138–165)      | 144 (122–171)         |
| RR diastolic (median) (IQR)                  | 81 (74–90)         | 82 (76–86)            |
| Brain parenchymal fraction                   | .61 (.02)          | .61 (.02)             |
| WMH volume (cm <sup>3</sup> ) (median) (IQR) | 6.5 (3.6–11.2)     | 6.9 (2.5–12.8)        |

**Note:**—IQR indicates interquartile range; CVD, cardiovascular disease (peripheral arterial disease, angina pectoris, myocardial infarction); RR, blood pressure; MMSE, Mini-Mental State Examination; BMI, body mass index.

<sup>a</sup> Data are means and SDs unless otherwise indicated. Values did not differ significantly between groups.

**On-line Table 2: CBF in subgroups based on quartiles of WMH load**

|             | Quartiles of White Matter Hyperintensity Volume |                        |                             |                     |
|-------------|-------------------------------------------------|------------------------|-----------------------------|---------------------|
|             | Low<br>(≤3.58 mL)                               | Mild<br>(3.59–6.40 mL) | Moderate<br>(6.41–11.18 mL) | High<br>(≥11.18 mL) |
| CBF in WMH  | 12.1 (6.2)                                      | 12.3 (6.6)             | 9.9 (6.4)                   | 7.9 (5.0)           |
| CBF in NAWM | 23.0 (6.1)                                      | 24.1 (7.7)             | 21.3 (8.6)                  | 21.4 (7.8)          |
| CBF in GM   | 44.7 (13.3)                                     | 48.1 (12.7)            | 41.7 (15.7)                 | 40.7 (14.2)         |

<sup>a</sup> Data are means and SDs.

**On-line Table 3: Relation between potential confounders and WMH volume<sup>a</sup>**

| Predictor                               | $\beta$ | P Value |
|-----------------------------------------|---------|---------|
| Age <sup>b</sup>                        | 0.13    | .09     |
| Sex (female)                            | 0.07    | .47     |
| Brain parenchymal fraction <sup>b</sup> | −0.13   | .10     |
| GM arterial transit time <sup>b</sup>   | 0.15    | .05     |
| Current smoker vs never                 | −0.06   | .45     |
| Former smoker vs never                  | −0.08   | .29     |
| History of stroke or TIA                | 0.10    | .23     |
| History of other CVD                    | −0.06   | .41     |
| Diabetes mellitus                       | 0.01    | .89     |
| BMI                                     | −0.10   | .19     |
| Antihypertensive drug use <sup>b</sup>  | 0.14    | .07     |
| Systolic blood pressure                 | −0.04   | .63     |
| Diastolic blood pressure                | 0.01    | .88     |

**Note:**—CVD indicates cardiovascular disease (peripheral arterial disease, angina pectoris, myocardial infarction); BMI, body mass index.

<sup>a</sup> Analyses were adjusted for total brain volume.

<sup>b</sup> Included as a confounder in model 2 of the main analyses.

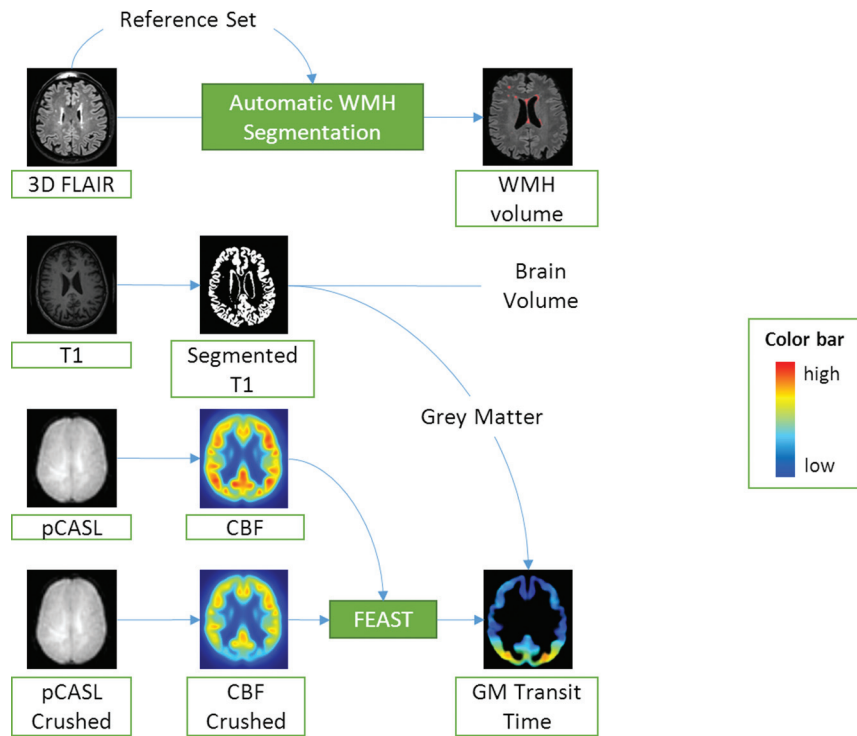

**ON-LINE FIG 1.** Scan processing. The reference set is a set of 20 scans with manually segmented WMHs. FEAST indicates flow encoded arterial spin tagging transit time calculation equation; pCASL, pseudocontinuous arterial spin-labeled/labeling.

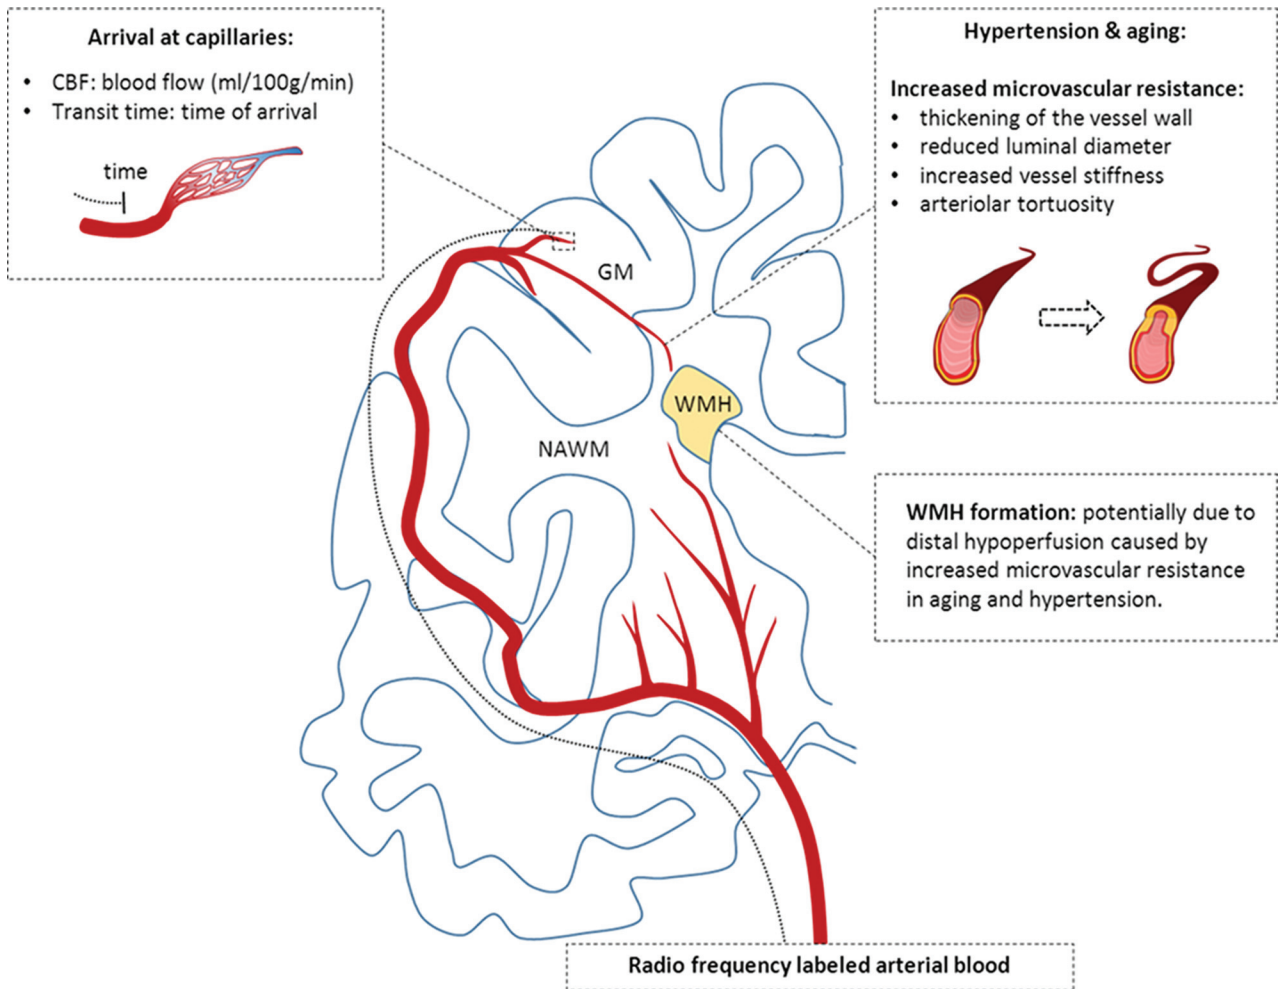

**ON-LINE-FIG 2.** Perfusion parameters and CBF regions. CBF was measured in the GM and indicates normal-appearing white matter and WMHs; arterial transit time was calculated in the GM only.

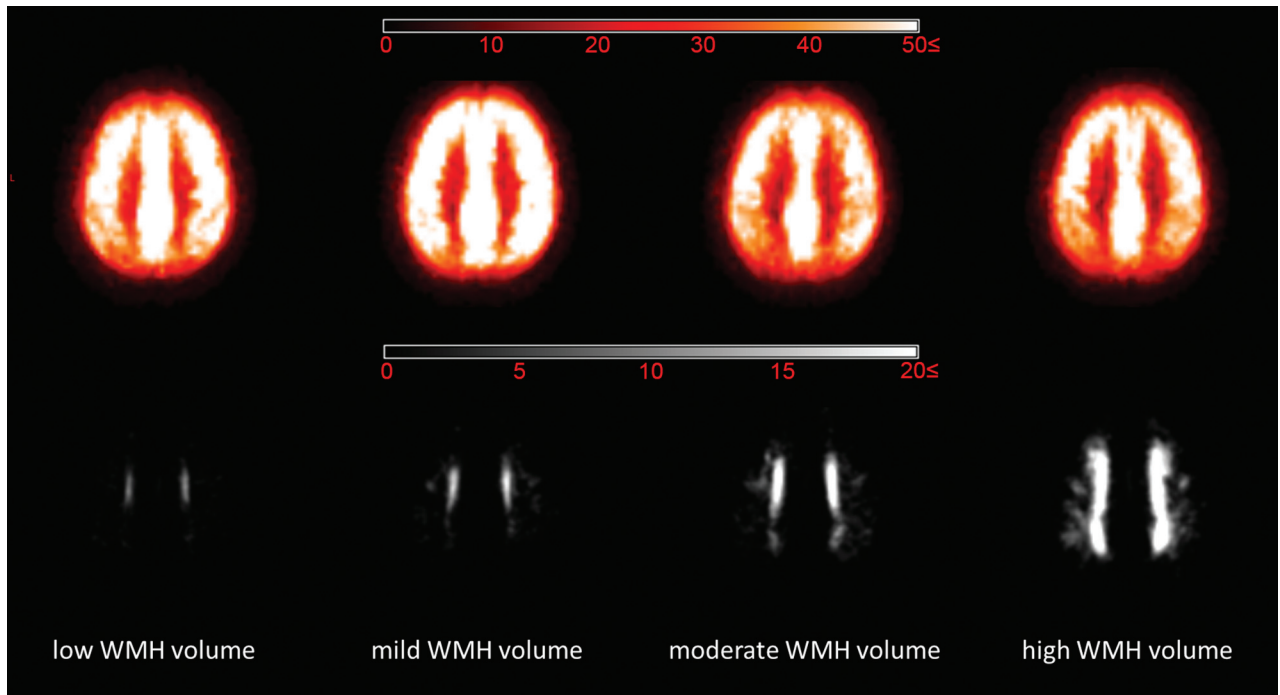

**ON-LINE-FIG 3.** Population maps of cerebral blood flow (above) and white matter hyperintensity load (below) per quartile of WMH volume (low,  $\leq 3.58$  mL; mild, 3.59–6.40 mL; moderate, 6.41–11.18 mL; high,  $\geq 11.18$  mL). Cross-section of the centrum semiovale above the ventricles. The color bar above indicates CBF in milliliters/100 g/min; the color bar below indicates the approximate percentage of participants with WMHs in that area.
